# Supplementary material for: The genomic history of Streptococcus mutans from the Mesolithic until modern times
Source: Research Square preprint supplement (doi:10.21203/rs.3.rs-5072844/v1), 2026-01-19
Supplement: Supplementary file 1 [file 3c825ed63aa2675d123cd4b3.docx]

Additional File 4: Manual Refinement

Anvi’o visualization of our ancient MAGs.

Each layer in these circular plots represents a statistics for each contig. The contigs are clustered together in a tree by 4-mer frequencies.

The green layer represents the GC content.

The black layers describe the number of reads from each library in the sample which can be mapped to the contig.

The outermost black layer (damage) describes the average local damage for each read used to assemble this contig as calculated through metaDMG

The familiarity layer is a binary layer which describes whether a gene cluster annotated within the contig can be found in any of the other 6 MAGs through a pangenome analysis before manual refinement is started.

Any contig marked as contaminant is mapped to the NCBI database of genes, to confirm that these cannot be mapped to *S. mutans.*


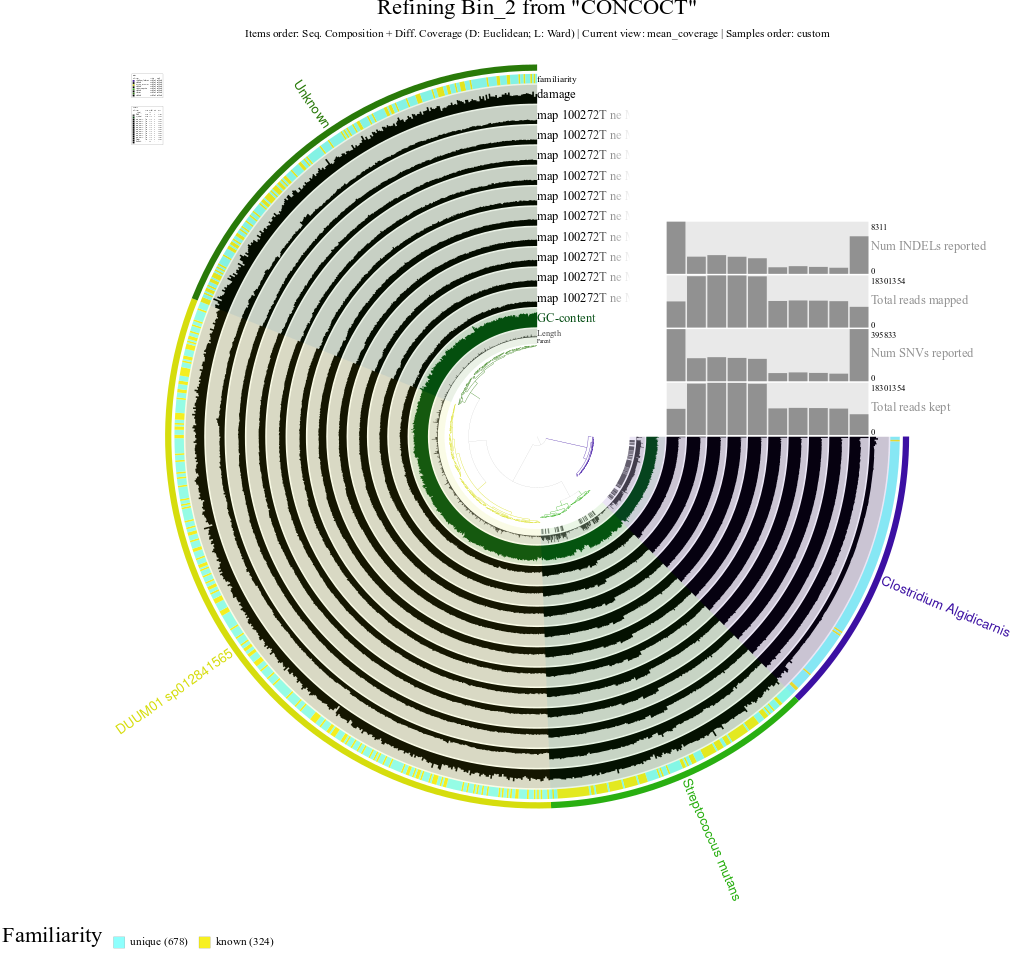
CGG100272: First Iteration


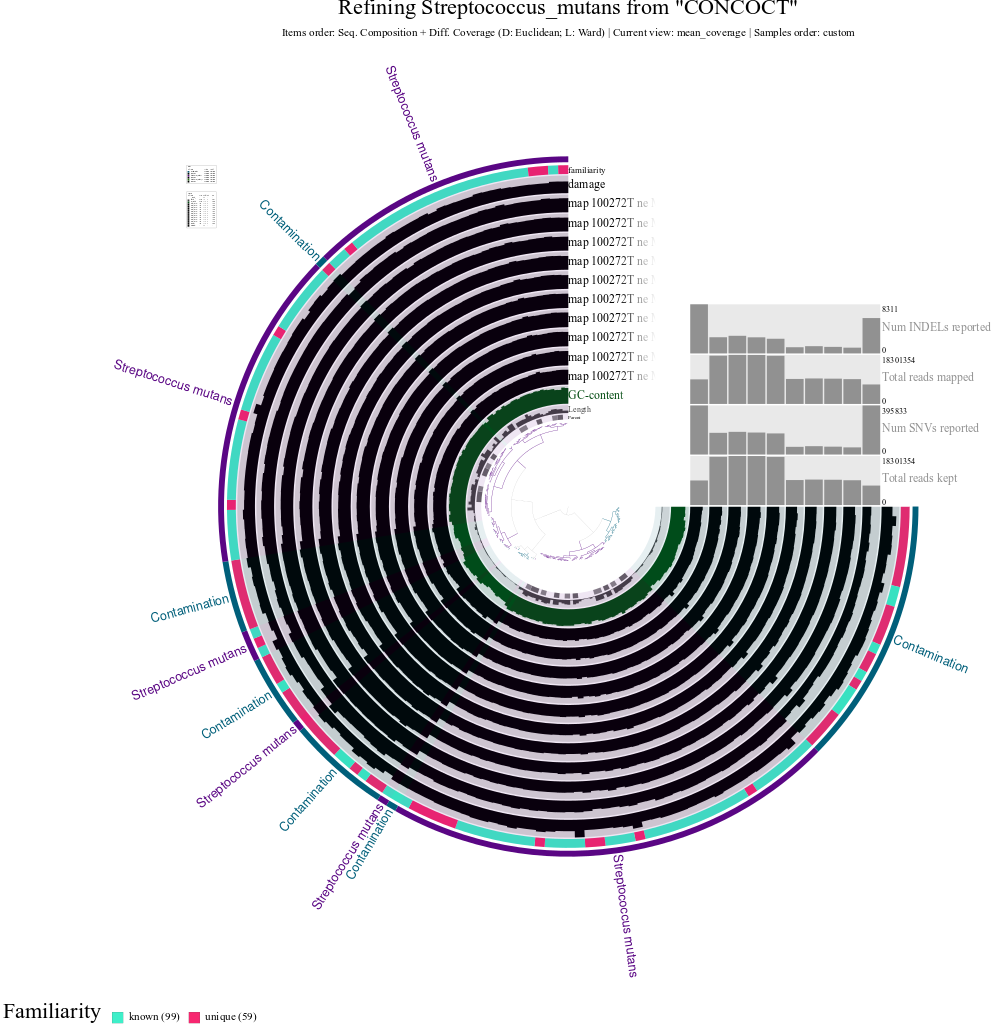
CGG100272: Second Iteration


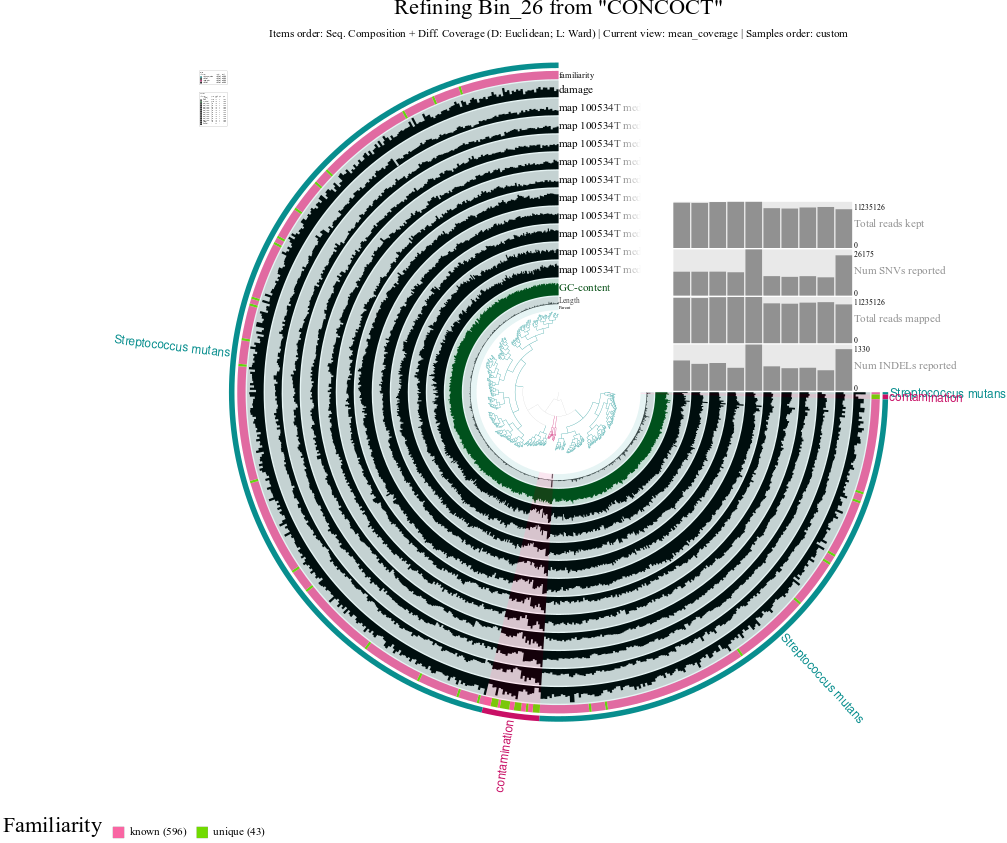
CGG100534


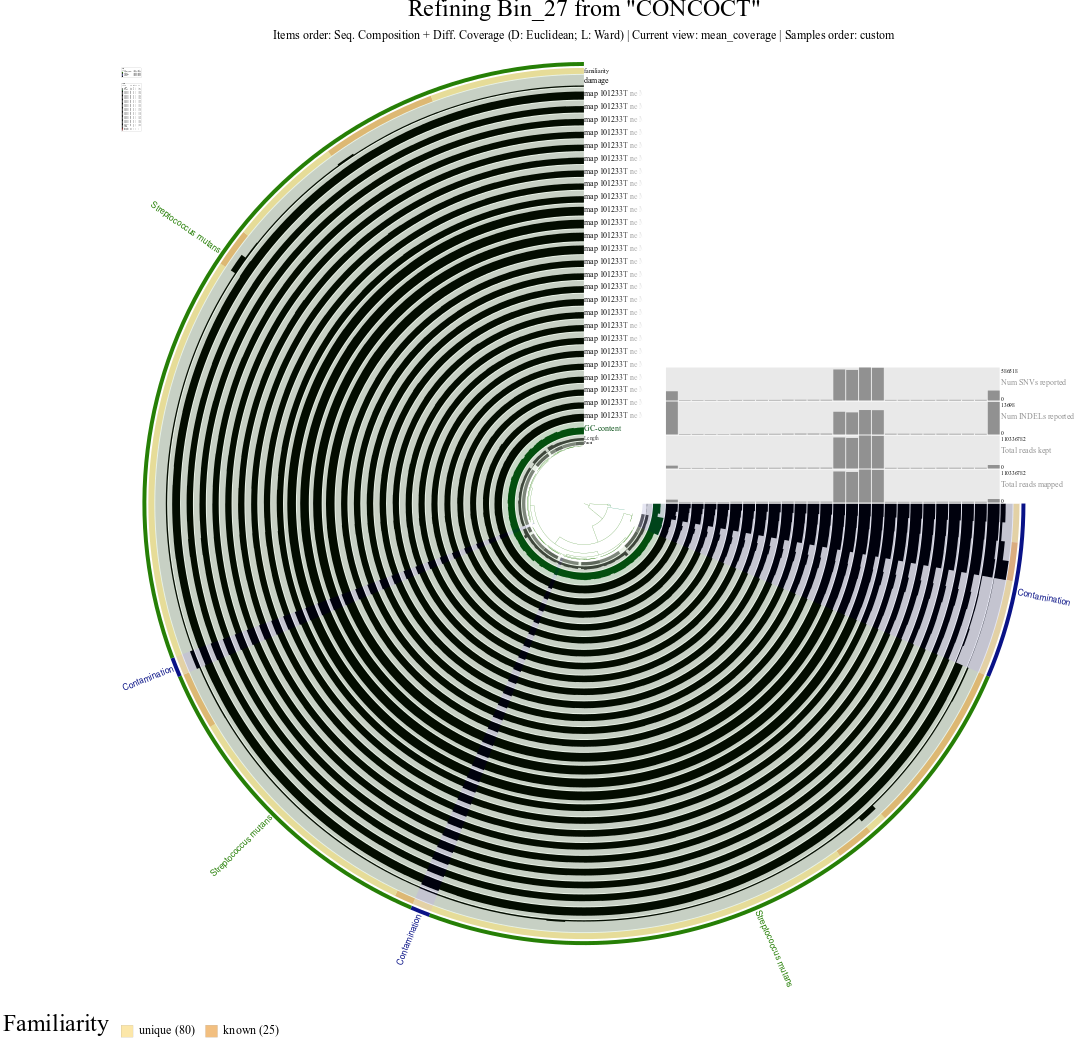
CGG101233


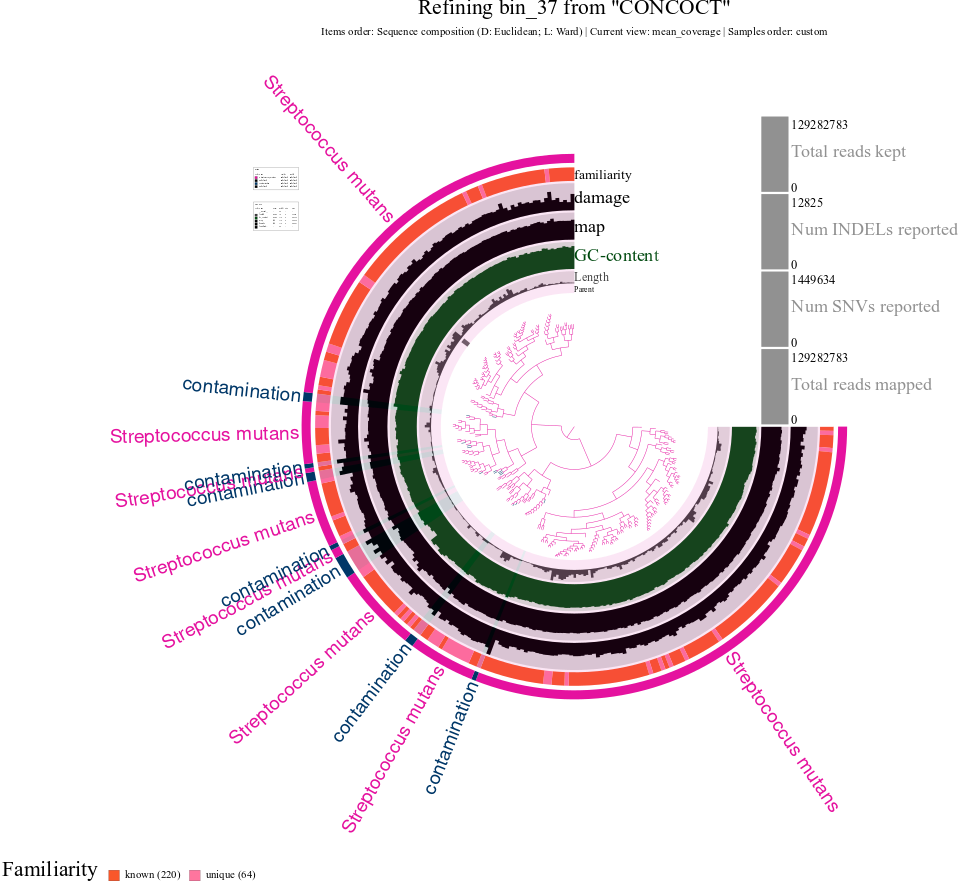
NEO105


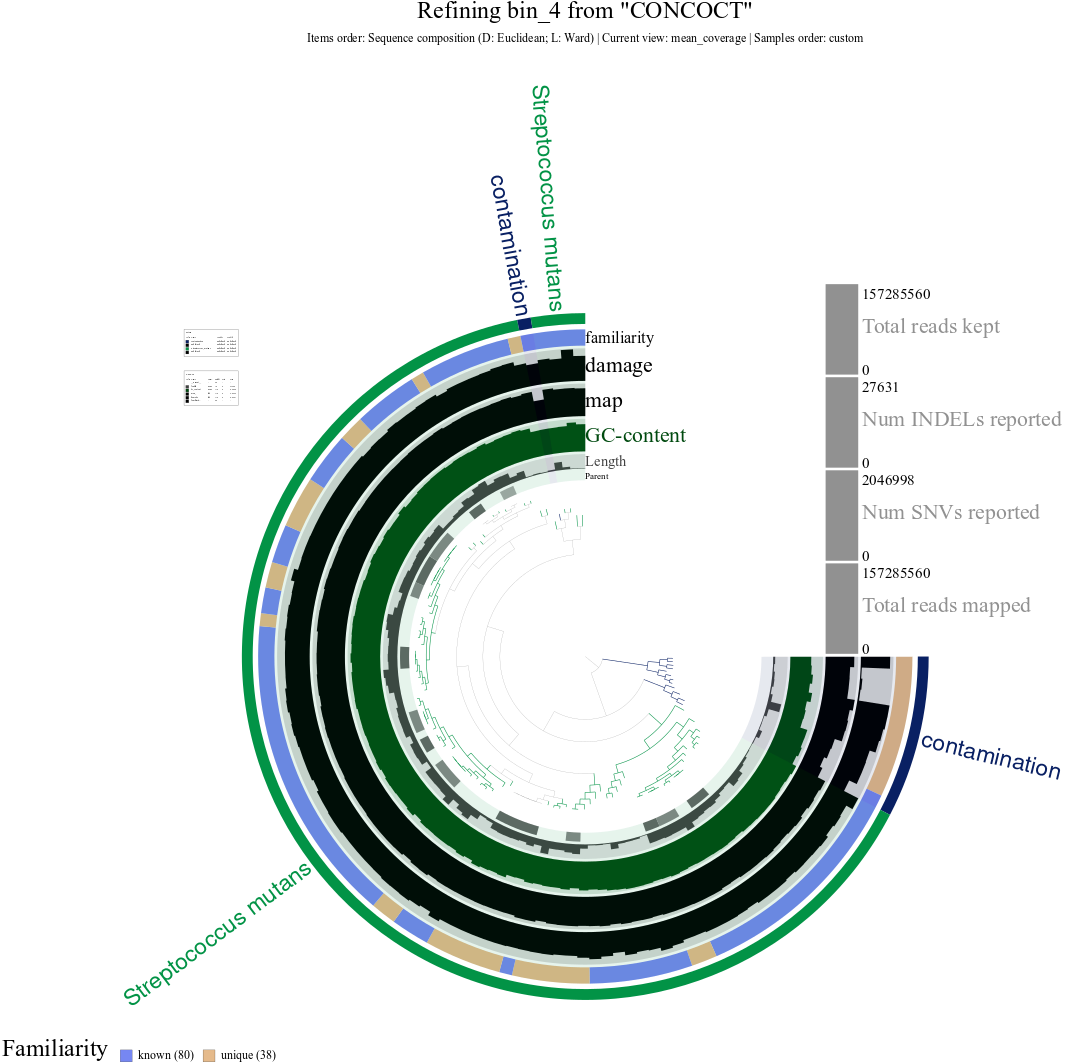
NEO137


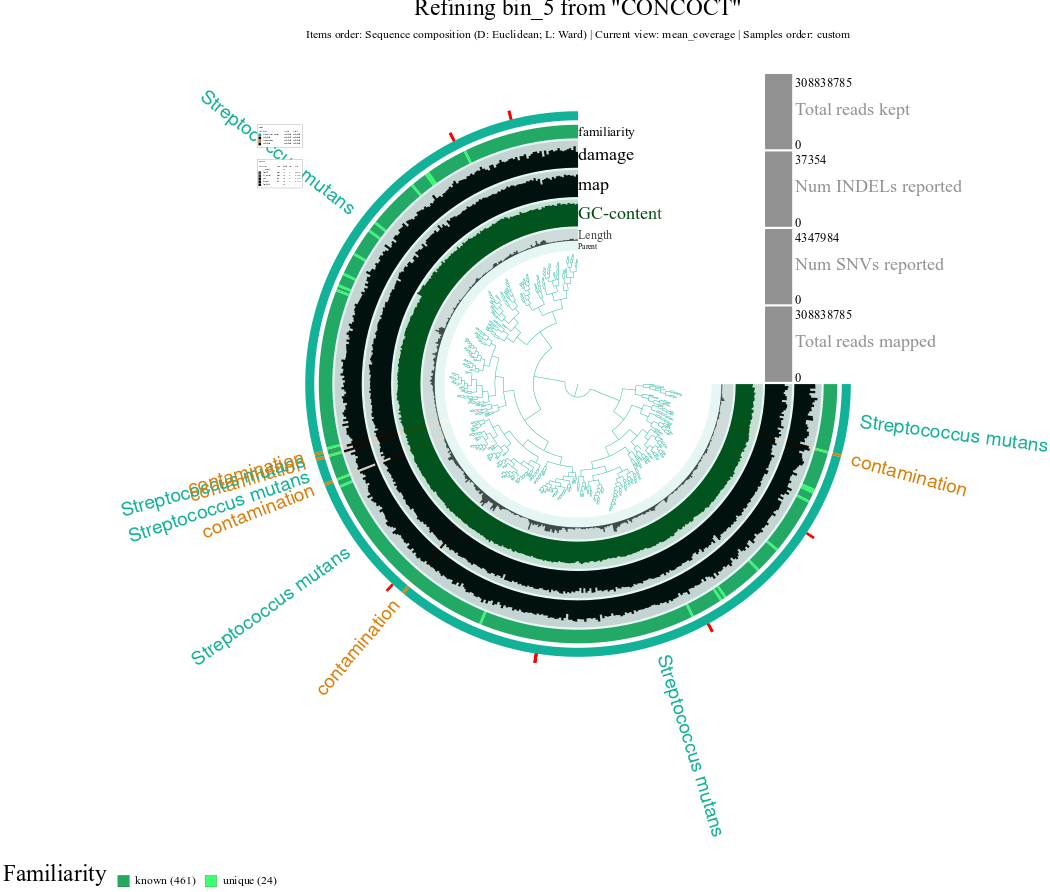
NEO938


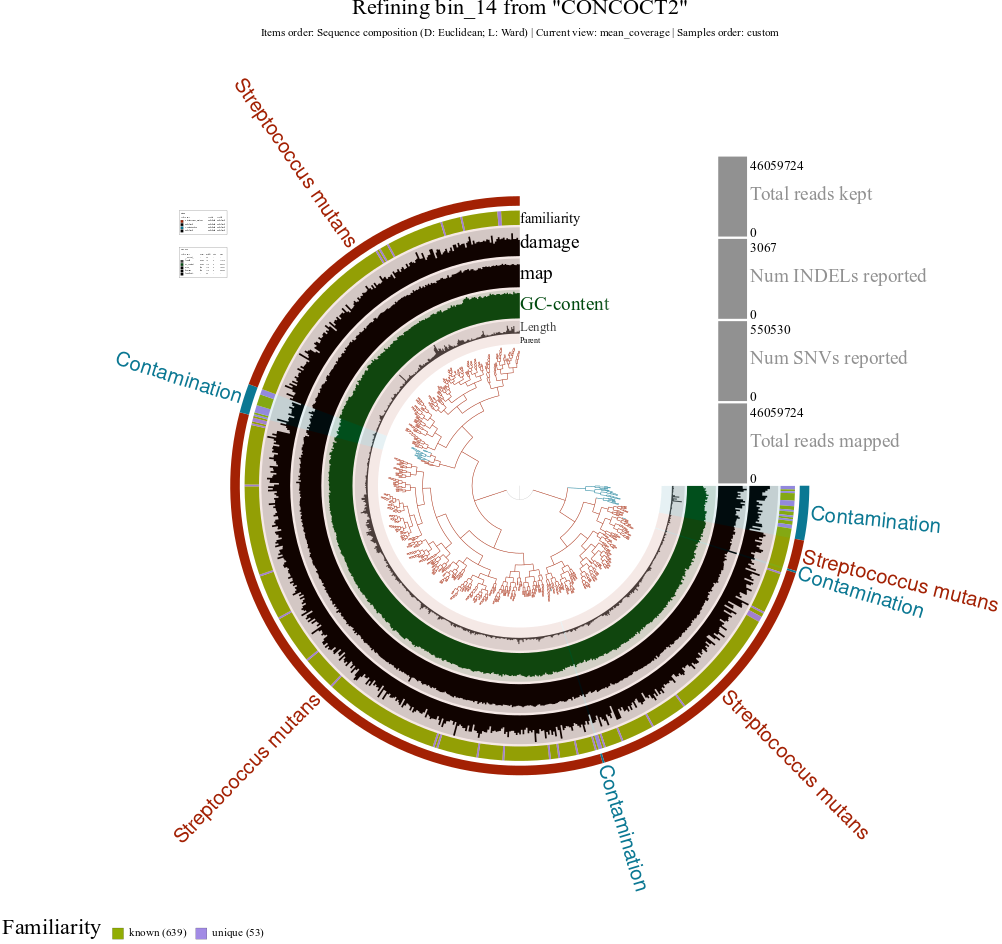
VK63
