# Supplementary material for: The genomic history of Streptococcus mutans from the Mesolithic until modern times
Source: Research Square preprint supplement (doi:10.21203/rs.3.rs-5072844/v1), 2026-01-19
Supplement: Supplementary file 3 [file ccc7cfab15edacb8befaf5f6.xlsx]

## Sheet: Sheet1
Gene	Product	Category	Ancient_count	Modern_freq	Comments
bacA	Bacitracin synthetase 1, BacA	Bacteriocin protein/transcriptional regulator	1	0
cwlC	Sporulation-specific N-acetylmuramoyl-L-alanine amidase CwlC	Cell envelope homeostasis	1	0
galM	Aldose 1-epimerase family protein	Carbohydrate metabolism and transport	5	0.840467
mcrC	5-methylcytosine-specific restriction enzyme subunit McrC	nuclease	2	0.153846	prevent invasion of foreign DNA
mutR	MutR family transcriptional regulator	Bacteriocin protein/transcriptional regulator	7	0.897833
pksJ	Polyketide synthase PksJ	Bacteriocin protein/transcriptional regulator	1	0
purQ	phosphoribosylformylglycinamidine synthase subunit PurQ	Amino Acid metabolism and transport	1	0.00766284
rnj1	Ribonuclease J 1	Translation	1	0
rpsN	type Z 30S ribosomal protein S14	Translation	1	0.00383142
rutF	FMN reductase RutF, DIM6/NTAB family	Energy production and conversion	4	0.399225
yhgE	Uncharacterized membrane protein YhgE, phage infection protein (PIP) family	ABC transporter	2	0.0615385
atpD	F0F1 ATP synthase subunit beta	Energy production and conversion	2	0	This shoukd be part of the core genome, atpD is part of a complex
cbiQ	Cobalamin biosynthesis protein CbiQ	Energy production and conversion	1	0	co-factor production
clpL	ATP-dependent Clp protease ATP-binding subunit ClpL	Protease	1	0
comF	ComF family protein	Other transporter	1	0.00766284
cpsX	CpsX	Other transcriptional regulator	1	0
dnaQ	bifunctional DnaQ family exonuclease/ATP-dependent helicase	nuclease	1	0
dsbA	DsbA family protein	stress tolerance	1	0
ftsJ	RNA binding methyltransferase FtsJ like	stress tolerance	1	0
galM	Galactose mutarotase or related enzyme	Carbohydrate metabolism and transport	5	0.840467
glyP	Sodium/glycine symporter GlyP	Energy production and conversion	2	0.00769231
hicA	HicA toxin of toxin-antitoxin	Toxin/anti-toxin	2	0.126923
mutA	lantibiotic mutacin I	Bacteriocin protein/transcriptional regulator	1	0.0957854
mutA'	mutacin-like lanthipeptide	Bacteriocin protein/transcriptional regulator	1	0.0651341
mutC	MutC	Bacteriocin protein/transcriptional regulator	1	0.0766284
mutD	(pseudo) MutD	Bacteriocin protein/transcriptional regulator	1	0.0842912
mutR	Transcriptional regulator MutR	Bacteriocin protein/transcriptional regulator	7	0.897833
natK	Sensor histidine kinase NatK C-terminal domain-containing protein	Two-component system	1	0
orfX	ABC transporter OrfX	ABC transporter	1	0.118774
rodA	Rod shape-determining protein RodA	Cell envelope homeostasis	1	0
ydcD	Protein YdcD	Nucleaic acid replication, recombination and repair	1	0
yrdB	(pseudo) YrdB family protein	Function Unknown	2	0.103846
yrrC	RecD-like DNA helicase YrrC	Nucleaic acid replication, recombination and repair	1	0
amaP	Alkaline shock response membrane anchor protein AmaP	stress tolerance	4	0.237037
aspD	bifunctional aspartate transaminase/aspartate 4-decarboxylase	Amino Acid metabolism and transport	1	0.0114943
aspT	aspartate-alanine antiporter	Amino Acid metabolism and transport	1	0.0114943
avrD	AvrD family macrolide biosynthetic protein	Bacteriocin protein/transcriptional regulator	3	0.169884
dexA	Dextranase	Carbohydrate metabolism and transport	2	0.176923	This shoukd be part of the core genome, atpD is part of a complex
dfsB	DUF1706 domain-containing protein	Bacteriocin protein/transcriptional regulator	1	0.210728
ftsN	avrD	Cell envelope homeostasis	1	0	category and gene annotation do no match
herA	Archaeal DNA helicase HerA or a related bacterial ATPase, contains HAS-barrel and ATPase domains	Nucleaic acid replication, recombination and repair	1	0.109848
hicA	(pseudo) HicA toxin of toxin-antitoxin	Toxin/anti-toxin	2	0.126923
phnA	Uncharacterized Zn-ribbon-containing protein	Central metabolism	2	0.226923
repB	Replication protein RepB	Nucleaic acid replication, recombination and repair	1	0.0871212
tnpW	transposon-encoded TnpW family protein	Transposase	1	0.0114943
yrdB	YrdB family protein	Function Unknown	2	0.103846
eamA	EamA family transporter	Toxin/anti-toxin	1	0.510714
eamA	(pseudo) EamA domain-containing protein	Toxin/anti-toxin	1	0.510714
lanM	Lantibiotic biosynthesis protein dehydration domain-containing protein	Bacteriocin protein/transcriptional regulator	1	0.283636
mukT	MukT	Bacteriocin protein/transcriptional regulator	1	0.210728
tetR	Transcriptional regulator, TetR family	Other transcriptional regulator	1	0.331126
ycaP	DUF421 domain-containing protein	Function Unknown	1	0.264368
msbA	(pseudo) Lipid A export ATP-binding/permease protein MsbA	ABC transporter	2	0.00384615
galM	aldose 1-epimerase family protein	Carbohydrate metabolism and transport	5	0.840467
yhgE	(pseudo) Uncharacterized membrane protein YhgE, phage infection protein (PIP) family	ABC transporter	2	0.0615385
ysxB	DUF464 domain-containing protein	Function Unknown	1	0.10728
phnA	PhnA family protein	Central metabolism	2	0.226923
comF	ComF operon protein A, DNA transporter ATPase	Other transporter	1	0.00766284
ssuC	Putative aliphatic sulfonates transport permease protein SsuC	Nucleaic acid replication, recombination and repair	1	0.00766284
tetR	Transcriptional regulator TetR C-terminal Firmicutes type domain-containing protein	Other transcriptional regulator	1	0.331126
macB	Macrolide export ATP-binding/permease protein MacB	Bacteriocin protein/transcriptional regulator	1	0.0114943
lanM	Lantibiotic modifying enzyme	Bacteriocin protein/transcriptional regulator	1	0.283636
esaA	type VII secretion protein EsaA	Bacteriocin protein/transcriptional regulator	1	0.0689655
essA	type VII secretion protein EssA	Bacteriocin protein/transcriptional regulator	1	0.0689655
essB	type VII secretion protein EssB	Bacteriocin protein/transcriptional regulator	1	0.0689655
essC	type VII secretion protein EssC	Bacteriocin protein/transcriptional regulator	1	0.0689655
mutA	lantibiotic mutacin 1140	Bacteriocin protein/transcriptional regulator	1	0.0957854
mutD	MutD	Bacteriocin protein/transcriptional regulator	1	0.0842912
mutR	MutR	Bacteriocin protein/transcriptional regulator	7	0.897833
tetR	TetR family transcriptional regulator	Other transcriptional regulator	1	0.331126
corF	CorF protein	Other transporter	1	0.0574713
pezA	type II toxin-antitoxin system antitoxin PezA	Toxin/anti-toxin	1	0.0229885
pezT	type II toxin-antitoxin system toxin PezT	Toxin/anti-toxin	1	0.0229885
xerC	Tyrosine recombinase XerC	Nucleaic acid replication, recombination and repair	2	0.0839695
lanC	lanthionine synthetase LanC family protein	Bacteriocin protein/transcriptional regulator	1	0.0498084
rli28	Listeria sRNA rli28	Small RNA	1	0.103448
rocC	Amino-acid permease RocC	Other transporter	1	0.0191571
alpA	DNA-binding transcriptional regulator AlpA	Other transcriptional regulator	1	0.0574713
ratA	RNA anti-toxin A	Toxin/anti-toxin	1	0.0574713
eamA	(pseudo) EamA family transporter	Toxin/anti-toxin	1	0.510714
rocC	Amino-acid permease RocC domain protein	Other transporter	1	0.0191571
mutA	lacticin 481 family lantibiotic	Bacteriocin protein/transcriptional regulator	1	0.0957854
herA	Helicase HerA central domain-containing protein	Nucleaic acid replication, recombination and repair	1	0.109848
lanM	type 2 lanthipeptide synthetase LanM	Bacteriocin protein/transcriptional regulator	1	0.283636
mutA	lantibiotic mutacin	Bacteriocin protein/transcriptional regulator	1	0.0957854
xerC	Site-specific recombinase XerC	Nucleaic acid replication, recombination and repair	2	0.0839695
lanM	type 2 lanthipeptide synthetase LanM family protein	Bacteriocin protein/transcriptional regulator	1	0.283636
xerC	Site-specific tyrosine recombinase XerC	Nucleaic acid replication, recombination and repair	2	0.0839695
bglA	6-phospho-beta-glucosidase BglA	Energy production and conversion	1	0.00383142
rutF	(pseudo) FMN reductase RutF, DIM6/NTAB family	Energy production and conversion	4	0.399225
mutR	(pseudo) Transcriptional regulator MutR	Bacteriocin protein/transcriptional regulator	7	0.897833
amaP	(pseudo) Alkaline shock response membrane anchor protein AmaP	stress tolerance	4	0.237037
mutR	(pseudo) MutR family transcriptional regulator	Bacteriocin protein/transcriptional regulator	7	0.897833
gbpA	Glucan-binding protein A, GbpA	biofilm	1	0.00766284
eamA	EamA domain-containing protein	Toxin/anti-toxin	1	0.510714
hipA	HipA domain-containing protein	posttranslational modification	1	0
atpD	F0F1 ATP synthase subunit beta	Energy production and conversion	2	0
bgcI	Restriction enzyme BgcI subunit beta	Nucleaic acid replication, recombination and repair	2	0
bgcI	Restriction enzyme BgcI subunit alpha	Nucleaic acid replication, recombination and repair	2	0
bhtE	BhtE protein	Bacteriocin protein/transcriptional regulator	1	0
gsiA	Glutathione import ATP-binding protein GsiA	stress tolerance	1	0
msbA	Lipid A export ATP-binding/permease protein MsbA	ABC transporter	2	0.00384615
proX	ProX	ABC transporter	1	0
rpsZ	type Z 30S ribosomal protein S14	Translation	2	0
vraR	Response regulator protein VraR	Other transcriptional regulator	1	0
glnP3	Glutamine transport substrate binding and permease protein 3 GlnP3	ABC transporter	1	0
